# Supplementary material for: Oxidative dehydrogenation of an amine group of a macrocyclic ligand in the coordination sphere of a CuII complex
Source: Royal Society of Chemistry journal article supplement (doi:10.1039/b902947h), 2009-01-01
Supplement: b902947h.pdf [file b902947h.pdf]

# Oxidative dehydrogenation of an amine group of a macrocyclic ligand in the coordination sphere of a Cu<sup>II</sup> complex

Gemma J. Christian,<sup>a</sup> Arnau Arbuse,<sup>b</sup> Xavier Fontrodona,<sup>b</sup> Ma Angeles Martinez,<sup>\*b</sup> Antoni Llobet,<sup>\*a,c</sup> and Feliu Maseras<sup>\*a,c</sup>

## Supporting information

**Table 1** Calculated bond angles for [Fe<sup>II</sup>L<sup>2+</sup>]Cl<sub>2</sub>. Experimental values from Sosa-Torres and co-workers.<sup>1</sup>

|                                    | Calculated bond angles | Experimental bond angles |
|------------------------------------|------------------------|--------------------------|
| N <sub>6</sub> -Fe-N <sub>5</sub>  | 81.5                   | 82.9                     |
| N <sub>6</sub> -Fe-N <sub>3</sub>  | 98.2                   | 97.5                     |
| N <sub>5</sub> -Fe-N <sub>3</sub>  | 85.5                   | 86.8                     |
| N <sub>6</sub> -Fe-N <sub>2</sub>  | 170.7                  | 173.2                    |
| N <sub>5</sub> -Fe-N <sub>2</sub>  | 90.1                   | 90.8                     |
| N <sub>3</sub> -Fe-N <sub>2</sub>  | 84.9                   | 84.8                     |
| N <sub>6</sub> -Fe-N <sub>1</sub>  | 95.7                   | 95.4                     |
| N <sub>2</sub> -Fe-N <sub>1</sub>  | 81.1                   | 82.3                     |
| N <sub>6</sub> -Fe-N <sub>4</sub>  | 93.8                   | 93.0                     |
| N <sub>5</sub> -Fe-N <sub>4</sub>  | 166.0                  | 167.8                    |
| N <sub>3</sub> -Fe-N <sub>4</sub>  | 82.1                   | 82.4                     |
| N <sub>2</sub> -Fe-N <sub>4</sub>  | 95.3                   | 93.6                     |
| N <sub>1</sub> -Fe-N <sub>4</sub>  | 98.6                   | 97.1                     |
| C <sub>9</sub> -N <sub>2</sub> -Fe | 117.2                  | 118.1                    |
| C <sub>7</sub> -N <sub>2</sub> -Fe | 116.9                  | 118.2                    |

(<sup>1</sup> J. P. Saucedo-Vázquez, V. M. Ugalde-Saldívar, A. R. Toscano, P. M. H. Kroneck and M. E. Sosa-Torres, *Inorg. Chem.*, 2009, **48**, 1214-1222.)

## 1. Calculated structures for the copper system

### 1.1 Reactant [Cu<sup>II</sup>(H<sub>2</sub>L')][CF<sub>3</sub>SO<sub>3</sub>]<sub>2</sub>

0 2

|   |           |           |           |
|---|-----------|-----------|-----------|
| C | -0.753155 | 2.454023  | -0.147059 |
| N | -0.116595 | 1.468528  | 0.760643  |
| C | -0.924010 | 1.214748  | 1.984773  |
| C | -0.220418 | 0.284266  | 2.988377  |
| C | -0.433760 | -1.216753 | 2.746311  |
| N | 0.280365  | -1.788739 | 1.575093  |
| C | -0.452573 | -2.979933 | 1.057091  |
| C | -1.614116 | -2.644335 | 0.122673  |
| C | -1.217232 | -2.152246 | -1.274425 |
| N | -0.743492 | -0.738280 | -1.335191 |
| C | -0.442965 | -0.354623 | -2.736411 |
| C | 1.670332  | -2.158223 | 1.890699  |
| C | 2.442326  | -2.475698 | 0.622406  |
| N | 2.125068  | -1.758603 | -0.477870 |
| C | 2.799118  | -1.961674 | -1.622672 |
| C | 3.812072  | -2.911776 | -1.731762 |
| C | 4.140775  | -3.665097 | -0.605211 |
| C | 3.446099  | -3.444480 | 0.585098  |

|    |           |           |           |
|----|-----------|-----------|-----------|
| Cu | 0.767730  | -0.208168 | -0.061821 |
| H  | -1.571181 | -0.160416 | -1.072940 |
| H  | -0.926359 | 3.401703  | 0.385717  |
| H  | -1.897188 | 0.804314  | 1.684578  |
| H  | -1.113592 | 2.188211  | 2.466780  |
| H  | 0.849869  | 0.532475  | 3.059730  |
| H  | -0.644261 | 0.497699  | 3.979844  |
| H  | -0.160065 | -1.784685 | 3.654621  |
| H  | -1.505217 | -1.375624 | 2.582207  |
| H  | 1.721200  | -3.019809 | 2.582110  |
| H  | 2.156672  | -1.306706 | 2.384989  |
| H  | 2.532648  | -1.313654 | -2.452890 |
| H  | 4.334566  | -3.039997 | -2.675756 |
| H  | 4.928988  | -4.413928 | -0.649637 |
| H  | 3.676049  | -4.015132 | 1.482148  |
| H  | -0.815912 | -3.577787 | 1.912009  |
| H  | 0.265154  | -3.612654 | 0.519950  |
| H  | -2.195622 | -3.565438 | -0.022974 |
| H  | -2.309629 | -1.941441 | 0.597536  |
| H  | -0.427835 | -2.789755 | -1.697521 |
| H  | -2.101570 | -2.228790 | -1.923894 |
| H  | -1.344873 | -0.451892 | -3.356817 |
| H  | 0.340927  | -1.004222 | -3.141501 |
| H  | -0.081465 | 2.638452  | -0.991674 |
| H  | -0.091061 | 0.680154  | -2.769492 |
| H  | 0.782632  | 1.855807  | 1.060280  |
| H  | -1.712258 | 2.063544  | -0.501514 |
| S  | 3.349410  | 1.235413  | -0.439088 |
| O  | 2.442255  | 1.280143  | -1.702139 |
| O  | 4.740559  | 0.604617  | -0.551357 |
| O  | 2.468058  | 0.695889  | 0.805073  |
| C  | 3.616764  | 3.100468  | 0.087736  |
| F  | 4.204986  | 3.755040  | -0.904744 |
| F  | 2.415728  | 3.638209  | 0.337940  |
| F  | 4.366087  | 3.140688  | 1.183033  |
| S  | -4.213478 | -0.162831 | -0.266724 |
| O  | -3.176001 | 0.649535  | -1.136293 |
| O  | -4.672925 | -1.485430 | -0.912566 |
| O  | -3.798615 | -0.240081 | 1.234988  |
| C  | -5.774521 | 1.000420  | -0.271711 |
| F  | -6.187198 | 1.187354  | -1.525313 |
| F  | -6.746859 | 0.432782  | 0.442223  |
| F  | -5.446321 | 2.175133  | 0.272869  |

## 1.2 [Cu<sup>I</sup>(H<sub>2</sub>L')][CF<sub>3</sub>SO<sub>3</sub>]

0 3

|   |           |           |           |
|---|-----------|-----------|-----------|
| C | -0.410902 | -3.344052 | 0.882757  |
| N | -0.534418 | -2.432668 | -0.274156 |
| C | -1.444066 | -2.992403 | -1.296111 |
| C | -1.758952 | -2.002027 | -2.417562 |
| C | -2.781141 | -0.937055 | -2.009108 |
| N | -2.270129 | 0.131146  | -1.111354 |
| C | -3.403771 | 0.722934  | -0.340553 |
| C | -3.824235 | -0.029618 | 0.928930  |
| C | -2.960271 | 0.245108  | 2.167779  |
| N | -1.699348 | -0.517156 | 2.175781  |

|    |           |           |           |
|----|-----------|-----------|-----------|
| C  | -0.852372 | -0.163032 | 3.331482  |
| C  | -1.607627 | 1.222891  | -1.919316 |
| C  | -0.949348 | 2.187299  | -0.994859 |
| N  | -0.268477 | 1.547690  | 0.051575  |
| C  | 0.461616  | 2.356325  | 0.914827  |
| C  | 0.497557  | 3.721296  | 0.790650  |
| C  | -0.226692 | 4.380838  | -0.251568 |
| C  | -0.947260 | 3.558439  | -1.143972 |
| Cu | -0.552421 | -0.366881 | 0.178124  |
| H  | -1.933129 | -1.509600 | 2.248362  |
| H  | -0.081688 | -4.346852 | 0.569531  |
| H  | -2.378638 | -3.292923 | -0.798442 |
| H  | -0.999062 | -3.910179 | -1.714576 |
| H  | -0.830887 | -1.545392 | -2.789998 |
| H  | -2.186127 | -2.563410 | -3.260790 |
| H  | -3.212388 | -0.460898 | -2.906989 |
| H  | -3.610849 | -1.440332 | -1.495092 |
| H  | -2.349950 | 1.714668  | -2.569956 |
| H  | -0.876148 | 0.708822  | -2.566120 |
| H  | 1.031272  | 1.828423  | 1.674079  |
| H  | 1.096872  | 4.293774  | 1.497087  |
| H  | -0.214347 | 5.461081  | -0.358980 |
| H  | -1.500799 | 3.993565  | -1.977253 |
| H  | -4.267967 | 0.810651  | -1.021728 |
| H  | -3.104813 | 1.743687  | -0.074361 |
| H  | -4.848838 | 0.292426  | 1.164318  |
| H  | -3.889774 | -1.114823 | 0.746234  |
| H  | -2.695121 | 1.310199  | 2.199287  |
| H  | -3.546173 | 0.033539  | 3.081359  |
| H  | -1.376627 | -0.298959 | 4.293220  |
| H  | -0.556240 | 0.887398  | 3.239557  |
| H  | 0.317605  | -2.932992 | 1.586124  |
| H  | 0.056872  | -0.770770 | 3.315121  |
| H  | 0.410324  | -2.372299 | -0.702232 |
| H  | -1.384609 | -3.450255 | 1.379724  |
| S  | 2.568034  | -1.158641 | 0.181565  |
| O  | 2.101218  | -1.870737 | -1.128101 |
| O  | 3.635797  | -1.847486 | 1.035212  |
| O  | 1.297941  | -0.692136 | 1.056214  |
| C  | 3.372510  | 0.515248  | -0.441843 |
| F  | 4.547479  | 0.223325  | -0.994313 |
| F  | 2.573784  | 1.078708  | -1.341854 |
| F  | 3.545358  | 1.324178  | 0.598738  |

### 1.3 [Cu(HL')][CF<sub>3</sub>SO<sub>3</sub>]

0 2

|   |           |           |           |
|---|-----------|-----------|-----------|
| C | 0.324911  | -3.141288 | -0.820214 |
| N | -0.732788 | -2.167179 | -1.044965 |
| C | -1.954402 | -2.832363 | -1.456309 |
| C | -3.035855 | -1.922533 | -2.051821 |
| C | -3.839315 | -1.091187 | -1.046546 |
| N | -3.097165 | 0.009847  | -0.405835 |
| C | -3.770003 | 0.452109  | 0.830835  |
| C | -3.473591 | -0.408824 | 2.065445  |
| C | -2.074340 | -0.254974 | 2.677818  |
| N | -1.008439 | -1.004639 | 1.976863  |

|    |           |           |           |
|----|-----------|-----------|-----------|
| C  | 0.231920  | -1.044460 | 2.789145  |
| C  | -2.903583 | 1.137166  | -1.324730 |
| C  | -1.864166 | 2.111910  | -0.809264 |
| N  | -0.771631 | 1.577626  | -0.222252 |
| C  | 0.192855  | 2.400160  | 0.235790  |
| C  | 0.103060  | 3.788486  | 0.119229  |
| C  | -1.017720 | 4.344828  | -0.494247 |
| C  | -2.019281 | 3.491119  | -0.960623 |
| Cu | -0.643925 | -0.516236 | -0.113257 |
| H  | -1.332595 | -1.968032 | 1.863775  |
| H  | 0.560477  | -3.673308 | -1.759838 |
| H  | -2.392824 | -3.415716 | -0.615012 |
| H  | -1.697240 | -3.590077 | -2.219736 |
| H  | -2.577108 | -1.286509 | -2.821634 |
| H  | -3.760403 | -2.562729 | -2.577229 |
| H  | -4.754636 | -0.695274 | -1.532476 |
| H  | -4.183310 | -1.763043 | -0.248956 |
| H  | -3.850856 | 1.675275  | -1.526063 |
| H  | -2.555719 | 0.736544  | -2.286033 |
| H  | 1.056836  | 1.925239  | 0.700145  |
| H  | 0.907890  | 4.408574  | 0.505872  |
| H  | -1.118171 | 5.423295  | -0.603237 |
| H  | -2.915713 | 3.883495  | -1.436587 |
| H  | -4.865195 | 0.499333  | 0.669096  |
| H  | -3.445880 | 1.478151  | 1.046042  |
| H  | -4.200240 | -0.119446 | 2.838663  |
| H  | -3.673247 | -1.471879 | 1.858103  |
| H  | -1.779469 | 0.803558  | 2.692261  |
| H  | -2.115230 | -0.585709 | 3.731111  |
| H  | 0.026563  | -1.398733 | 3.813415  |
| H  | 0.671032  | -0.043154 | 2.840663  |
| H  | 1.231324  | -2.651377 | -0.459571 |
| H  | 0.970696  | -1.697563 | 2.315798  |
| H  | 0.021527  | -3.918395 | -0.088600 |
| S  | 2.772170  | -0.264067 | 0.502961  |
| O  | 1.564419  | -0.226925 | -0.517096 |
| O  | 2.746939  | 0.925772  | 1.503619  |
| O  | 3.050149  | -1.667217 | 1.090708  |
| C  | 4.295588  | 0.106898  | -0.655690 |
| F  | 4.382110  | -0.838362 | -1.592575 |
| F  | 5.412785  | 0.119846  | 0.072815  |
| F  | 4.126463  | 1.298348  | -1.235829 |

#### 1.4 [Cu(HL')][CF<sub>3</sub>SO<sub>3</sub>]<sub>2</sub>

0 3

|   |           |           |           |
|---|-----------|-----------|-----------|
| C | 0.321843  | -1.234691 | -3.109302 |
| N | -0.726674 | -0.566929 | -2.377895 |
| C | -1.544981 | 0.303329  | -3.207231 |
| C | -2.516447 | 1.265291  | -2.516003 |
| C | -3.655224 | 0.614615  | -1.724593 |
| N | -3.266227 | 0.050133  | -0.415192 |
| C | -4.234432 | -0.980777 | 0.006619  |
| C | -3.924784 | -2.376626 | -0.536418 |
| C | -2.735035 | -3.073445 | 0.132743  |
| N | -1.395866 | -2.698881 | -0.386916 |
| C | -0.376814 | -3.633156 | 0.159824  |

|    |           |           |           |
|----|-----------|-----------|-----------|
| C  | -3.135946 | 1.082161  | 0.623908  |
| C  | -2.363648 | 0.568908  | 1.825469  |
| N  | -1.283976 | -0.209433 | 1.588995  |
| C  | -0.505070 | -0.608344 | 2.610278  |
| C  | -0.795870 | -0.280758 | 3.931980  |
| C  | -1.917680 | 0.504302  | 4.194125  |
| C  | -2.708507 | 0.933627  | 3.128028  |
| Cu | -0.755806 | -0.567998 | -0.349115 |
| H  | -1.419438 | -2.831639 | -1.401112 |
| H  | 0.081386  | -1.353656 | -4.176137 |
| H  | -2.099464 | -0.353867 | -3.907439 |
| H  | -0.859229 | 0.889480  | -3.843516 |
| H  | -1.952245 | 1.966438  | -1.894769 |
| H  | -2.978954 | 1.854560  | -3.321955 |
| H  | -4.473529 | 1.348026  | -1.589084 |
| H  | -4.077298 | -0.205935 | -2.321981 |
| H  | -4.123106 | 1.456044  | 0.955337  |
| H  | -2.588460 | 1.944375  | 0.219678  |
| H  | 0.380722  | -1.170464 | 2.326879  |
| H  | -0.139627 | -0.620465 | 4.728745  |
| H  | -2.171254 | 0.787774  | 5.213831  |
| H  | -3.582096 | 1.559875  | 3.293911  |
| H  | -5.260491 | -0.680347 | -0.278728 |
| H  | -4.224569 | -1.033782 | 1.102951  |
| H  | -4.810645 | -3.005247 | -0.364678 |
| H  | -3.784791 | -2.350320 | -1.628439 |
| H  | -2.734250 | -2.869153 | 1.211968  |
| H  | -2.855079 | -4.164335 | 0.020468  |
| H  | -0.707545 | -4.676796 | 0.032287  |
| H  | -0.251513 | -3.433379 | 1.228662  |
| H  | 1.244946  | -0.629299 | -3.004690 |
| H  | 0.586278  | -3.482918 | -0.332697 |
| H  | 0.573438  | -2.201631 | -2.656751 |
| O  | -0.123611 | 1.325744  | -0.685055 |
| S  | 0.206638  | 2.532019  | 0.341439  |
| O  | -0.920723 | 3.590615  | 0.271928  |
| O  | 0.701554  | 2.100921  | 1.730963  |
| C  | 1.755304  | 3.310002  | -0.563415 |
| F  | 1.475387  | 3.452163  | -1.858426 |
| F  | 2.796855  | 2.511741  | -0.397336 |
| F  | 1.996477  | 4.504135  | -0.020752 |
| O  | 1.278224  | -1.155622 | 0.313062  |
| S  | 2.561735  | -1.450386 | -0.570183 |
| O  | 2.549229  | -2.893416 | -1.144432 |
| O  | 2.942553  | -0.325416 | -1.557416 |
| C  | 3.951826  | -1.433321 | 0.796136  |
| F  | 3.593550  | -2.258706 | 1.785179  |
| F  | 4.087630  | -0.197894 | 1.269056  |
| F  | 5.100700  | -1.846002 | 0.262644  |

## 1.5 Imine product [Cu<sup>I</sup>(L')]<sup>+</sup>

|     |          |           |           |
|-----|----------|-----------|-----------|
| 1 1 |          |           |           |
| C   | 1.919573 | -0.895408 | -2.912497 |
| N   | 1.850922 | -0.697201 | -1.649244 |
| C   | 2.882786 | -1.327865 | -0.804133 |
| C   | 2.298288 | -2.241934 | 0.287306  |

|    |           |           |           |
|----|-----------|-----------|-----------|
| C  | 1.697985  | -1.551296 | 1.521713  |
| N  | 0.446489  | -0.788151 | 1.293198  |
| C  | 0.178502  | 0.136525  | 2.427462  |
| C  | 0.963696  | 1.457462  | 2.406101  |
| C  | 0.473979  | 2.520251  | 1.411971  |
| N  | 0.901206  | 2.281102  | 0.007932  |
| C  | 0.408293  | 3.353266  | -0.888897 |
| C  | -0.704567 | -1.692565 | 1.097551  |
| C  | -1.859399 | -1.027084 | 0.369373  |
| N  | -1.537006 | -0.144681 | -0.605286 |
| C  | -2.531451 | 0.404884  | -1.331087 |
| C  | -3.876831 | 0.110007  | -1.121234 |
| C  | -4.211076 | -0.789884 | -0.108104 |
| C  | -3.185995 | -1.362750 | 0.647149  |
| Cu | 0.470443  | 0.341131  | -0.649359 |
| H  | 1.923503  | 2.326696  | -0.004490 |
| H  | 2.710597  | -1.505119 | -3.365161 |
| H  | 3.464126  | -0.519177 | -0.337867 |
| H  | 3.574119  | -1.910332 | -1.432500 |
| H  | 1.585384  | -2.940058 | -0.172862 |
| H  | 3.125820  | -2.864491 | 0.655710  |
| H  | 1.536797  | -2.307714 | 2.312165  |
| H  | 2.440458  | -0.846244 | 1.915581  |
| H  | -1.056513 | -2.114637 | 2.055384  |
| H  | -0.370571 | -2.541114 | 0.486243  |
| H  | -2.226127 | 1.103458  | -2.107336 |
| H  | -4.638589 | 0.580378  | -1.737486 |
| H  | -5.250212 | -1.041163 | 0.092587  |
| H  | -3.409055 | -2.068587 | 1.444328  |
| H  | 0.369502  | -0.389194 | 3.380519  |
| H  | -0.893035 | 0.373778  | 2.411494  |
| H  | 0.872721  | 1.893428  | 3.410793  |
| H  | 2.040570  | 1.277165  | 2.265168  |
| H  | -0.624045 | 2.558343  | 1.415831  |
| H  | 0.828624  | 3.512568  | 1.737806  |
| H  | 0.679678  | 4.355541  | -0.521759 |
| H  | -0.683516 | 3.292249  | -0.954863 |
| H  | 1.173961  | -0.450173 | -3.570444 |
| H  | 0.828974  | 3.212455  | -1.889674 |

## 1.6 Protonated product [Cu<sup>I</sup>(H<sub>4</sub>L')][CF<sub>3</sub>SO<sub>3</sub>]<sub>3</sub>

|    |           |           |          |
|----|-----------|-----------|----------|
| 01 |           |           |          |
| C  | 4.677323  | 3.028418  | 1.478951 |
| N  | 3.754362  | 1.864778  | 1.550626 |
| C  | 3.320971  | 1.507966  | 2.940999 |
| C  | 2.259267  | 0.398715  | 2.959462 |
| C  | 0.825518  | 0.908894  | 2.688612 |
| N  | -0.014434 | -0.038882 | 1.939757 |
| C  | -1.304660 | 0.540589  | 1.509494 |
| C  | -2.144143 | 1.234511  | 2.604611 |
| C  | -3.569065 | 1.585500  | 2.162654 |
| N  | -3.614463 | 2.312876  | 0.843356 |
| C  | -4.879089 | 3.073366  | 0.623200 |
| C  | -0.139551 | -1.374454 | 2.514791 |
| C  | -0.483440 | -2.438707 | 1.477163 |
| N  | -0.104310 | -2.234456 | 0.194807 |

|    |           |           |           |
|----|-----------|-----------|-----------|
| C  | -0.363885 | -3.197550 | -0.716340 |
| C  | -0.984508 | -4.399479 | -0.392876 |
| C  | -1.370560 | -4.616496 | 0.930549  |
| C  | -1.122649 | -3.616628 | 1.869541  |
| Cu | 0.896553  | -0.609818 | -0.290128 |
| H  | -2.805124 | 2.932656  | 0.729920  |
| H  | 5.577508  | 2.818271  | 2.064392  |
| H  | 2.952789  | 2.425010  | 3.419040  |
| H  | 4.224057  | 1.185552  | 3.471618  |
| H  | 2.534465  | -0.377746 | 2.236216  |
| H  | 2.313178  | -0.079034 | 3.946798  |
| H  | 0.372596  | 1.190945  | 3.659073  |
| H  | 0.863763  | 1.816680  | 2.073274  |
| H  | -0.881517 | -1.431135 | 3.335047  |
| H  | 0.827666  | -1.651311 | 2.954052  |
| H  | -0.057749 | -2.978939 | -1.735985 |
| H  | -1.166398 | -5.138776 | -1.168580 |
| H  | -1.864511 | -5.540521 | 1.223928  |
| H  | -1.423768 | -3.740113 | 2.908156  |
| H  | -1.890191 | -0.259958 | 1.045419  |
| H  | -1.079726 | 1.251065  | 0.707188  |
| H  | -2.242841 | 0.589769  | 3.490385  |
| H  | -1.636167 | 2.149478  | 2.943607  |
| H  | -4.196340 | 0.699766  | 2.012301  |
| H  | -4.050368 | 2.227392  | 2.911051  |
| H  | -4.994483 | 3.839624  | 1.396540  |
| H  | -5.699758 | 2.351055  | 0.654792  |
| H  | 4.943129  | 3.188571  | 0.430886  |
| H  | -4.835768 | 3.536782  | -0.366655 |
| H  | 2.919338  | 2.089044  | 0.939219  |
| H  | 4.170333  | 3.916930  | 1.866109  |
| H  | 4.243590  | 1.022678  | 1.137481  |
| H  | -3.564461 | 1.558406  | 0.036971  |
| O  | 0.290636  | 1.142661  | -1.203156 |
| S  | 1.109763  | 2.493891  | -1.220492 |
| O  | 1.658007  | 2.900755  | 0.202990  |
| O  | 2.057324  | 2.736881  | -2.396258 |
| C  | -0.361060 | 3.774762  | -1.409352 |
| F  | -1.055955 | 3.801333  | -0.242574 |
| F  | -1.173991 | 3.404929  | -2.387377 |
| F  | 0.123046  | 4.989988  | -1.641703 |
| O  | -3.616467 | 0.505874  | -1.034157 |
| S  | -4.966370 | -0.337787 | -0.927610 |
| O  | -5.716143 | 0.000204  | 0.396609  |
| O  | -5.782690 | -0.429926 | -2.218494 |
| C  | -4.258359 | -2.122904 | -0.615286 |
| F  | -3.623982 | -2.125261 | 0.570390  |
| F  | -3.396414 | -2.448746 | -1.578043 |
| F  | -5.252237 | -3.007976 | -0.580830 |
| O  | 2.871160  | -0.250189 | -0.612054 |
| S  | 3.990996  | -1.227281 | -0.039241 |
| O  | 5.093871  | -0.374940 | 0.683306  |
| O  | 3.455124  | -2.442467 | 0.736931  |
| C  | 4.838285  | -1.923634 | -1.653466 |
| F  | 5.370239  | -0.913275 | -2.329222 |
| F  | 3.899761  | -2.524089 | -2.380930 |

F 5.778362 -2.797664 -1.306694

### 1.7 Product $[\text{Cu}^{\text{I}}(\text{NCMe})_4][\text{CF}_3\text{SO}_3]$

0 1

|    |           |           |           |
|----|-----------|-----------|-----------|
| S  | 2.860465  | 0.751482  | -0.171012 |
| F  | 1.527875  | -1.583147 | 0.344309  |
| O  | 2.122774  | 1.372128  | 1.060971  |
| F  | 3.431625  | -1.419539 | 1.391443  |
| O  | 4.360503  | 1.057171  | -0.292273 |
| F  | 3.392311  | -1.866874 | -0.746684 |
| O  | 2.023911  | 0.838740  | -1.488164 |
| C  | 2.807590  | -1.166618 | 0.233991  |
| Cu | -2.278727 | -0.026861 | 0.012093  |
| N  | -4.241279 | -0.196057 | 0.049312  |
| N  | -1.283619 | -0.427187 | 1.743284  |
| N  | -1.313810 | -1.110920 | -1.418816 |
| N  | -1.502964 | 1.822023  | -0.384165 |
| C  | -5.397571 | -0.289667 | 0.059114  |
| C  | -6.850436 | -0.407099 | 0.070106  |
| H  | -7.148778 | -1.360750 | 0.522119  |
| H  | -7.239965 | -0.364103 | -0.954194 |
| H  | -7.290960 | 0.412544  | 0.650518  |
| C  | -0.354339 | -0.416899 | 2.439411  |
| C  | 0.839102  | -0.374871 | 3.270428  |
| H  | 1.273149  | -1.377804 | 3.355686  |
| H  | 0.597347  | 0.004380  | 4.270171  |
| H  | 1.562920  | 0.288921  | 2.769673  |
| C  | -0.385772 | -1.370793 | -2.066708 |
| C  | 0.806139  | -1.649684 | -2.852652 |
| H  | 1.248662  | -2.602985 | -2.541451 |
| H  | 1.523225  | -0.836530 | -2.652935 |
| H  | 0.560658  | -1.692435 | -3.920213 |
| C  | -0.619935 | 2.564821  | -0.514709 |
| C  | 0.494439  | 3.488032  | -0.658223 |
| H  | 1.052876  | 3.231379  | -1.565395 |
| H  | 1.171227  | 3.332001  | 0.192032  |
| H  | 0.137896  | 4.524021  | -0.698260 |

### 1.8 Protonated free ligand $[\text{H}_4\text{L}'][\text{CF}_3\text{SO}_3]_2$

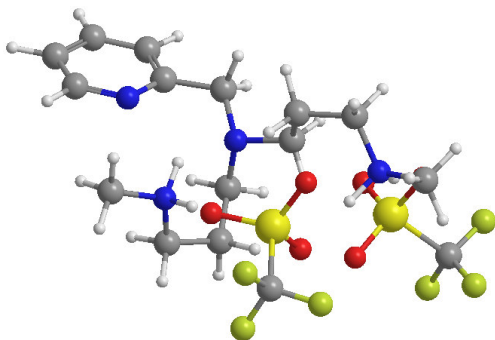

Figure 1 Chem3D figure of the optimised structure of  $[\text{H}_4\text{L}'][\text{CF}_3\text{SO}_3]_2$

0 1

C -3.283208 1.125021 2.339065



|   |           |           |           |
|---|-----------|-----------|-----------|
| N | -2.075899 | 0.462120  | 1.777833  |
| C | -0.954149 | 0.326306  | 2.768683  |
| C | 0.411121  | 0.112169  | 2.100114  |
| C | 0.395742  | -0.975523 | 1.021080  |
| N | 1.688723  | -1.125387 | 0.313379  |
| C | 1.457984  | -1.615912 | -1.075525 |
| C | 0.986946  | -0.490425 | -2.010538 |
| C | 2.044805  | 0.585856  | -2.264306 |
| N | 2.452260  | 1.281269  | -0.995397 |
| C | 3.654111  | 2.141638  | -1.128809 |
| C | 2.580579  | -2.016113 | 1.059199  |
| C | 4.036549  | -1.962052 | 0.627854  |
| N | 4.532580  | -0.781027 | 0.214041  |
| C | 5.840306  | -0.717960 | -0.082367 |
| C | 6.714189  | -1.801279 | 0.010466  |
| C | 6.193244  | -3.028340 | 0.425006  |
| C | 4.836293  | -3.109469 | 0.733171  |
| H | 1.681016  | 1.914499  | -0.647195 |
| H | -3.033201 | 2.162188  | 2.578604  |
| H | -1.221693 | -0.517694 | 3.415622  |
| H | -0.929187 | 1.244293  | 3.363652  |
| H | 0.753738  | 1.059964  | 1.666064  |
| H | 1.122699  | -0.131745 | 2.902911  |
| H | 0.068843  | -1.942329 | 1.437468  |
| H | -0.346170 | -0.711077 | 0.263673  |
| H | 2.229142  | -3.064414 | 1.023695  |
| H | 2.540868  | -1.715125 | 2.116796  |
| H | 6.210580  | 0.255648  | -0.407889 |
| H | 7.765730  | -1.684286 | -0.241205 |
| H | 6.830665  | -3.907311 | 0.502562  |
| H | 4.392367  | -4.049911 | 1.053846  |
| H | 0.721511  | -2.435090 | -1.079132 |
| H | 2.410590  | -2.019069 | -1.447167 |
| H | 0.732134  | -0.936364 | -2.981499 |
| H | 0.057282  | -0.035695 | -1.646915 |
| H | 2.959035  | 0.145835  | -2.683749 |
| H | 1.681513  | 1.355854  | -2.955180 |
| H | 3.446612  | 2.928821  | -1.859702 |
| H | 4.501361  | 1.532723  | -1.451309 |
| H | -4.074546 | 1.089466  | 1.585313  |
| H | 3.862667  | 2.597713  | -0.158085 |
| H | -2.358539 | -0.516119 | 1.446680  |
| H | -3.607892 | 0.584414  | 3.233238  |
| H | -1.762123 | 1.015620  | 0.941839  |
| H | 2.590575  | 0.527380  | -0.276393 |
| O | 1.000968  | 3.359063  | -0.063749 |
| S | -0.525429 | 3.298154  | 0.294447  |
| O | -1.233825 | 2.063605  | -0.365353 |
| O | -0.873135 | 3.501083  | 1.786979  |
| C | -1.257688 | 4.843829  | -0.633324 |
| F | -1.018118 | 4.719170  | -1.937443 |
| F | -0.673071 | 5.943756  | -0.165471 |
| F | -2.569204 | 4.895922  | -0.413347 |
| O | -1.334273 | -3.701448 | -0.155121 |
| S | -2.401982 | -2.583838 | -0.195806 |
| O | -2.841429 | -2.052574 | 1.229541  |

|   |           |           |           |
|---|-----------|-----------|-----------|
| O | -2.151368 | -1.424841 | -1.197616 |
| C | -4.024024 | -3.460600 | -0.822352 |
| F | -4.370058 | -4.420250 | 0.036135  |
| F | -3.797906 | -3.993688 | -2.024437 |
| F | -5.005304 | -2.560248 | -0.909409 |

## 2. Calculated structures for the iron system

### 2.1 Reactant [Fe<sup>III</sup>H<sub>2</sub>L<sup>2'</sup>]<sub>3</sub>Cl<sub>3</sub>

0 2

|    |           |           |           |
|----|-----------|-----------|-----------|
| Fe | -0.300401 | 0.011830  | -0.276478 |
| N  | -0.404391 | -0.474361 | 1.662424  |
| C  | 0.373059  | -1.361530 | 2.328390  |
| H  | 1.197760  | -1.813458 | 1.780038  |
| C  | 0.208008  | -1.598964 | 3.689198  |
| H  | 0.873420  | -2.301479 | 4.183020  |
| C  | -0.780768 | -0.902764 | 4.386550  |
| H  | -0.930231 | -1.068742 | 5.451572  |
| C  | -1.562124 | 0.029148  | 3.705140  |
| H  | -2.328234 | 0.607158  | 4.215781  |
| C  | -1.353775 | 0.228375  | 2.340299  |
| C  | -2.169944 | 1.190036  | 1.526837  |
| H  | -2.335892 | 2.130536  | 2.070265  |
| N  | -1.442017 | 1.479213  | 0.266555  |
| C  | -2.288484 | 1.943934  | -0.859803 |
| H  | -2.661673 | 2.952317  | -0.634407 |
| H  | -3.139692 | 1.265375  | -0.975599 |
| C  | -1.344136 | 2.028497  | -2.053577 |
| H  | -0.689310 | 2.889926  | -1.875947 |
| H  | -1.877568 | 2.169919  | -3.003479 |
| N  | -0.455148 | 0.801900  | -2.148854 |
| C  | -1.028726 | -0.265556 | -3.018616 |
| H  | -0.223076 | -0.974287 | -3.235689 |
| H  | -1.376551 | 0.155913  | -3.974403 |
| C  | -2.162618 | -0.974539 | -2.287345 |
| H  | -2.385116 | -1.928447 | -2.782718 |
| H  | -3.094266 | -0.399394 | -2.288605 |
| N  | -1.809113 | -1.204113 | -0.848672 |
| H  | -2.729158 | -1.017221 | -0.334496 |
| C  | -1.430115 | -2.599118 | -0.531982 |
| H  | -2.085742 | -3.313742 | -1.047124 |
| H  | -1.585942 | -2.737447 | 0.546455  |
| C  | 0.018977  | -2.808036 | -0.870567 |
| C  | 0.568801  | -4.035305 | -1.211629 |
| H  | -0.070826 | -4.911824 | -1.284108 |
| C  | 1.949039  | -4.118671 | -1.450712 |
| H  | 2.402498  | -5.070968 | -1.717760 |
| C  | 2.723381  | -2.974582 | -1.324236 |
| H  | 3.801941  | -2.991211 | -1.446629 |
| C  | 2.105472  | -1.765788 | -0.983554 |
| H  | 2.688859  | -0.864888 | -0.858435 |
| N  | 0.773283  | -1.676729 | -0.788903 |
| C  | 0.912120  | 1.205341  | -2.584534 |
| H  | 1.403283  | 0.318894  | -3.007453 |
| C  | 1.700038  | 1.687626  | -1.393020 |

|    |           |           |           |
|----|-----------|-----------|-----------|
| N  | 1.356470  | 1.108025  | -0.208226 |
| C  | 2.084025  | 1.380404  | 0.892128  |
| H  | 1.790006  | 0.893062  | 1.809977  |
| C  | 3.167678  | 2.260886  | 0.857261  |
| H  | 3.728248  | 2.437496  | 1.769428  |
| C  | 3.498356  | 2.877128  | -0.339253 |
| H  | 4.324396  | 3.582699  | -0.390782 |
| C  | 2.753356  | 2.580224  | -1.489378 |
| H  | 2.987136  | 3.040958  | -2.446100 |
| H  | 0.867364  | 1.965985  | -3.376541 |
| H  | -3.147247 | 0.732954  | 1.283426  |
| H  | -0.802307 | 2.330569  | 0.466255  |
| Cl | 3.560141  | -1.235698 | 1.554200  |
| Cl | -0.147393 | 4.139442  | 0.544404  |
| Cl | -4.623039 | -0.707641 | 0.065316  |

## 2.2 Intermediate [Fe(HL)]Cl<sub>2</sub>

0 2

|    |           |           |           |
|----|-----------|-----------|-----------|
| Fe | -0.337630 | -0.324912 | -0.116855 |
| N  | -0.392858 | 1.609804  | -0.639883 |
| C  | 0.372866  | 2.622821  | -0.172993 |
| H  | 1.165062  | 2.363423  | 0.524133  |
| C  | 0.231287  | 3.926652  | -0.640365 |
| H  | 0.888006  | 4.699851  | -0.251574 |
| C  | -0.728499 | 4.197147  | -1.616887 |
| H  | -0.865095 | 5.208030  | -1.996537 |
| C  | -1.498528 | 3.147827  | -2.117394 |
| H  | -2.245892 | 3.313256  | -2.889994 |
| C  | -1.304449 | 1.859958  | -1.617319 |
| C  | -2.073459 | 0.660877  | -2.087956 |
| H  | -2.110925 | 0.632640  | -3.192566 |
| N  | -1.435773 | -0.523544 | -1.550160 |
| C  | -2.161975 | -1.769313 | -1.682821 |
| H  | -2.363105 | -2.006890 | -2.742957 |
| H  | -3.146138 | -1.688376 | -1.188268 |
| C  | -1.266007 | -2.861255 | -1.091233 |
| H  | -0.525713 | -3.152667 | -1.843637 |
| H  | -1.831391 | -3.760052 | -0.806091 |
| N  | -0.484554 | -2.352023 | 0.098761  |
| C  | -1.157760 | -2.602744 | 1.402253  |
| H  | -0.403194 | -2.467314 | 2.184759  |
| H  | -1.525998 | -3.639561 | 1.465217  |
| C  | -2.299147 | -1.609976 | 1.598956  |
| H  | -2.632190 | -1.632554 | 2.646061  |
| H  | -3.176305 | -1.849255 | 0.988079  |
| N  | -1.892982 | -0.226794 | 1.203894  |
| H  | -2.768425 | 0.164177  | 0.759380  |
| C  | -1.518374 | 0.648670  | 2.331265  |
| H  | -2.173650 | 0.490503  | 3.200189  |
| H  | -1.671959 | 1.685375  | 1.999206  |
| C  | -0.068143 | 0.453362  | 2.684430  |
| C  | 0.455862  | 0.734112  | 3.941921  |
| H  | -0.206843 | 1.053940  | 4.743098  |
| C  | 1.836224  | 0.614924  | 4.145156  |
| H  | 2.269479  | 0.836675  | 5.118585  |
| C  | 2.640015  | 0.230679  | 3.078464  |

|    |           |           |           |
|----|-----------|-----------|-----------|
| H  | 3.721372  | 0.174975  | 3.161829  |
| C  | 2.044591  | -0.055866 | 1.847077  |
| H  | 2.655336  | -0.307881 | 0.989344  |
| N  | 0.711276  | 0.030341  | 1.654252  |
| C  | 0.898553  | -2.895662 | 0.063276  |
| H  | 1.337660  | -2.752700 | 1.059143  |
| C  | 1.716343  | -2.126691 | -0.947183 |
| N  | 1.361570  | -0.820928 | -1.092082 |
| C  | 2.112821  | -0.022788 | -1.872085 |
| H  | 1.816983  | 1.014407  | -1.940395 |
| C  | 3.213776  | -0.511751 | -2.586700 |
| H  | 3.797957  | 0.179035  | -3.186764 |
| C  | 3.546224  | -1.853940 | -2.480724 |
| H  | 4.391692  | -2.262940 | -3.030100 |
| C  | 2.785996  | -2.679406 | -1.636927 |
| H  | 3.027661  | -3.732719 | -1.512347 |
| H  | 0.905901  | -3.976143 | -0.147985 |
| H  | -3.122817 | 0.722945  | -1.719143 |
| Cl | 3.609366  | 1.815482  | -0.043653 |
| Cl | -4.677903 | 0.212384  | 0.024290  |

### 2.3 Imine product [Fe<sup>II</sup>L<sup>2+</sup>]<sup>+</sup>Cl<sub>2</sub><sup>-</sup>

|    |           |           |           |
|----|-----------|-----------|-----------|
| 01 |           |           |           |
| Fe | -0.274143 | -0.359206 | -0.029896 |
| N  | -0.602691 | 1.542259  | -0.578505 |
| C  | 0.041115  | 2.665171  | -0.206513 |
| H  | 0.938987  | 2.542445  | 0.395963  |
| C  | -0.355865 | 3.928697  | -0.656656 |
| H  | 0.213401  | 4.798955  | -0.341274 |
| C  | -1.453878 | 4.042676  | -1.508312 |
| H  | -1.789294 | 5.016978  | -1.857794 |
| C  | -2.107242 | 2.880509  | -1.923283 |
| H  | -2.962463 | 2.914541  | -2.593509 |
| C  | -1.649214 | 1.648943  | -1.456921 |
| C  | -2.204710 | 0.362680  | -1.861443 |
| H  | -3.079816 | 0.296876  | -2.504142 |
| N  | -1.563561 | -0.669045 | -1.416082 |
| C  | -2.093638 | -2.016693 | -1.541198 |
| H  | -2.328339 | -2.275054 | -2.584721 |
| H  | -3.042038 | -2.035939 | -0.981105 |
| C  | -1.031663 | -2.981221 | -0.998430 |
| H  | -0.301353 | -3.178223 | -1.790581 |
| H  | -1.474061 | -3.945311 | -0.707278 |
| N  | -0.257122 | -2.401856 | 0.160409  |
| C  | -0.851625 | -2.714680 | 1.486966  |
| H  | -0.078341 | -2.520412 | 2.238459  |
| H  | -1.131194 | -3.778957 | 1.560296  |
| C  | -2.062503 | -1.817408 | 1.747340  |
| H  | -2.358811 | -1.902346 | 2.803607  |
| H  | -2.931650 | -2.119908 | 1.153603  |
| N  | -1.777638 | -0.403068 | 1.381931  |
| H  | -2.675330 | -0.040223 | 0.975622  |
| C  | -1.376284 | 0.459255  | 2.507895  |
| H  | -1.918877 | 0.209585  | 3.432728  |
| H  | -1.660017 | 1.486864  | 2.238665  |
| C  | 0.116223  | 0.409158  | 2.719565  |

|    |           |           |           |
|----|-----------|-----------|-----------|
| C  | 0.716550  | 0.729761  | 3.933451  |
| H  | 0.095491  | 0.958835  | 4.796986  |
| C  | 2.113142  | 0.773510  | 4.012860  |
| H  | 2.603594  | 1.031029  | 4.949699  |
| C  | 2.855876  | 0.506002  | 2.867936  |
| H  | 3.939407  | 0.580003  | 2.853961  |
| C  | 2.189232  | 0.168753  | 1.687831  |
| H  | 2.742113  | 0.013987  | 0.769396  |
| N  | 0.842000  | 0.094541  | 1.613414  |
| C  | 1.169093  | -2.804757 | 0.054014  |
| H  | 1.646127  | -2.580852 | 1.016646  |
| C  | 1.831888  | -1.985811 | -1.030367 |
| N  | 1.325348  | -0.730540 | -1.180417 |
| C  | 1.924753  | 0.107436  | -2.047624 |
| H  | 1.521493  | 1.108367  | -2.114756 |
| C  | 3.017182  | -0.287033 | -2.828933 |
| H  | 3.475394  | 0.438507  | -3.494225 |
| C  | 3.505931  | -1.580274 | -2.706647 |
| H  | 4.350557  | -1.916172 | -3.304746 |
| C  | 2.902338  | -2.448198 | -1.784159 |
| H  | 3.264255  | -3.465035 | -1.646900 |
| H  | 1.282290  | -3.885368 | -0.129705 |
| Cl | 3.306083  | 2.235478  | -0.371887 |
| Cl | -4.491870 | 0.075185  | -0.041471 |

## 2.4 Product $[\text{Fe}^{\text{II}}\text{H}_2\text{L}^{2'}]\text{Cl}_2$

|     |           |           |           |
|-----|-----------|-----------|-----------|
| O 1 |           |           |           |
| Fe  | 0.141354  | 0.133578  | -0.187919 |
| N   | 0.245869  | -0.960560 | 1.493729  |
| C   | 0.410791  | -0.518552 | 2.760707  |
| H   | 0.518493  | 0.557025  | 2.876663  |
| C   | 0.439730  | -1.365399 | 3.861353  |
| H   | 0.575626  | -0.953486 | 4.858258  |
| C   | 0.282710  | -2.739509 | 3.651157  |
| H   | 0.292959  | -3.434444 | 4.488334  |
| C   | 0.100380  | -3.202184 | 2.352308  |
| H   | -0.041749 | -4.259729 | 2.145427  |
| C   | 0.086876  | -2.295724 | 1.287003  |
| C   | -0.065766 | -2.730421 | -0.141222 |
| H   | -0.770398 | -3.570294 | -0.205835 |
| N   | -0.579079 | -1.577849 | -0.916029 |
| C   | -0.335024 | -1.633618 | -2.369853 |
| H   | -0.984752 | -2.379823 | -2.853174 |
| H   | 0.704345  | -1.934341 | -2.544991 |
| C   | -0.680082 | -0.247900 | -2.920941 |
| H   | -1.769059 | -0.126528 | -2.885678 |
| H   | -0.363612 | -0.133916 | -3.968486 |
| N   | -0.093037 | 0.866491  | -2.084037 |
| C   | 1.246458  | 1.308650  | -2.555334 |
| H   | 1.448667  | 2.275562  | -2.080451 |
| H   | 1.252403  | 1.466986  | -3.646607 |
| C   | 2.317327  | 0.296412  | -2.152795 |
| H   | 3.310624  | 0.759274  | -2.249328 |
| H   | 2.328382  | -0.585695 | -2.802119 |
| N   | 2.097224  | -0.213342 | -0.766668 |
| H   | 2.385584  | -1.227092 | -0.835324 |

|    |           |           |           |
|----|-----------|-----------|-----------|
| C  | 2.960505  | 0.414187  | 0.247088  |
| H  | 3.989277  | 0.562633  | -0.115419 |
| H  | 3.019508  | -0.281590 | 1.096767  |
| C  | 2.360467  | 1.711765  | 0.721287  |
| C  | 3.119422  | 2.750829  | 1.262971  |
| H  | 4.201897  | 2.652031  | 1.309386  |
| C  | 2.479999  | 3.895194  | 1.739642  |
| H  | 3.054575  | 4.714487  | 2.166582  |
| C  | 1.087197  | 3.962871  | 1.656380  |
| H  | 0.538035  | 4.829007  | 2.017320  |
| C  | 0.395222  | 2.893819  | 1.094764  |
| H  | -0.687997 | 2.904619  | 1.015361  |
| N  | 1.006119  | 1.782854  | 0.623803  |
| C  | -1.052619 | 1.996511  | -1.989103 |
| H  | -0.490767 | 2.879260  | -1.654964 |
| C  | -2.127737 | 1.670883  | -0.977170 |
| N  | -1.736375 | 0.846420  | 0.033793  |
| C  | -2.648455 | 0.499439  | 0.962925  |
| H  | -2.322918 | -0.204759 | 1.717437  |
| C  | -3.938426 | 1.040921  | 0.985789  |
| H  | -4.629736 | 0.725348  | 1.761431  |
| C  | -4.321510 | 1.913722  | -0.022653 |
| H  | -5.325460 | 2.332398  | -0.046127 |
| C  | -3.404232 | 2.215187  | -1.039335 |
| H  | -3.677349 | 2.863696  | -1.869201 |
| H  | -1.492834 | 2.245266  | -2.967844 |
| H  | 0.916760  | -3.042036 | -0.544509 |
| H  | -1.617556 | -1.603742 | -0.747063 |
| Cl | 3.054103  | -2.974838 | -1.628711 |
| Cl | -3.460138 | -2.185971 | -0.002578 |

## 2.5 Protonated ligand [H<sub>4</sub>L<sup>2+</sup>]<sup>+</sup>Cl<sub>2</sub>

|     |           |           |           |
|-----|-----------|-----------|-----------|
| 0 1 |           |           |           |
| N   | 2.405823  | -0.507713 | 0.158600  |
| H   | 1.959520  | -1.380531 | 0.491510  |
| N   | -0.562960 | 1.712442  | 0.704815  |
| N   | -2.376137 | -0.945586 | -0.092557 |
| C   | -1.496497 | 5.522993  | -1.027898 |
| C   | -0.216941 | 4.133314  | 0.286037  |
| C   | -0.371016 | 6.141189  | -1.577893 |
| H   | -2.498412 | 5.833851  | -1.330640 |
| C   | 0.970879  | 4.689022  | -0.211345 |
| C   | 0.889534  | 5.711805  | -1.157137 |
| H   | -0.484377 | 6.937625  | -2.310697 |
| H   | 1.929505  | 4.313356  | 0.145785  |
| H   | 1.794602  | 6.166370  | -1.557177 |
| C   | 4.279800  | -1.958489 | -0.635330 |
| C   | 6.457690  | -2.614748 | -0.331209 |
| C   | 3.800211  | -3.250371 | -0.369188 |
| C   | 6.082747  | -3.927411 | -0.034269 |
| H   | 7.509416  | -2.325183 | -0.331978 |
| C   | 4.724215  | -4.248236 | -0.057075 |
| H   | 2.731278  | -3.461848 | -0.409642 |
| H   | 6.837299  | -4.674231 | 0.204158  |
| H   | 4.386601  | -5.260442 | 0.159047  |
| C   | -4.524910 | -2.120039 | -0.432582 |

|    |           |           |           |
|----|-----------|-----------|-----------|
| C  | -5.822429 | -2.180026 | 1.471757  |
| C  | -5.561003 | -2.641303 | -1.214527 |
| C  | -6.909401 | -2.711649 | 0.778349  |
| H  | -5.883136 | -1.975857 | 2.540273  |
| C  | -6.772316 | -2.944060 | -0.592974 |
| H  | -5.418512 | -2.808801 | -2.280399 |
| H  | -7.837668 | -2.932653 | 1.299281  |
| H  | -7.598654 | -3.353075 | -1.170888 |
| N  | -1.436145 | 4.545019  | -0.113449 |
| N  | -4.653447 | -1.890213 | 0.881696  |
| N  | 5.584440  | -1.642391 | -0.624837 |
| C  | 3.328838  | -0.829741 | -0.978042 |
| H  | 3.900809  | 0.077768  | -1.188908 |
| H  | 2.696885  | -1.093647 | -1.834273 |
| C  | 1.305055  | 0.436519  | -0.205425 |
| H  | 1.785116  | 1.388125  | -0.446456 |
| H  | 0.778041  | 0.026837  | -1.071977 |
| C  | 0.367395  | 0.623054  | 0.993955  |
| H  | 0.984842  | 0.845345  | 1.875636  |
| H  | -0.164833 | -0.314959 | 1.195068  |
| C  | -2.529268 | 0.532444  | -0.342338 |
| H  | -3.607254 | 0.701915  | -0.450098 |
| C  | -1.981768 | 1.431492  | 0.777830  |
| H  | -2.493695 | 2.393868  | 0.658138  |
| C  | -0.167072 | 3.006812  | 1.298532  |
| H  | -0.811406 | 3.257965  | 2.159279  |
| H  | 0.860298  | 2.906858  | 1.668251  |
| H  | -2.033277 | 0.761687  | -1.290963 |
| H  | -2.305658 | 1.015088  | 1.759220  |
| C  | -3.155088 | -1.824750 | -1.017664 |
| H  | -3.218636 | -1.342503 | -1.998826 |
| H  | -2.556011 | -2.740326 | -1.126493 |
| H  | -1.370701 | -1.317087 | -0.127095 |
| H  | 2.954468  | 0.029667  | 0.921085  |
| H  | -2.756898 | -1.157421 | 0.850086  |
| Cl | 3.504068  | 1.793247  | 1.726018  |
| Cl | 0.084609  | -2.692398 | -0.310110 |

## 2.6 [Fe<sup>II</sup>(MeOH)<sub>6</sub>]Cl<sub>2</sub>

|    |           |           |           |
|----|-----------|-----------|-----------|
| 01 |           |           |           |
| Fe | 0.000313  | 0.000364  | -0.000666 |
| O  | -1.213215 | -0.301641 | 1.616304  |
| O  | -1.214063 | 1.553940  | -0.543301 |
| O  | -1.213513 | -1.249229 | -1.072185 |
| O  | 1.214112  | 0.301981  | -1.617252 |
| O  | 1.211829  | -1.554065 | 0.542878  |
| O  | 1.210753  | 1.251917  | 1.071976  |
| C  | -1.212953 | -2.676334 | -0.879213 |
| H  | -1.536343 | -2.936451 | 0.136815  |
| H  | -1.888856 | -3.137621 | -1.609089 |
| H  | -0.192737 | -3.028396 | -1.038070 |
| C  | 1.212796  | -0.584035 | -2.752706 |
| H  | 1.548543  | -1.589063 | -2.467129 |
| H  | 0.189621  | -0.634614 | -3.127646 |
| H  | 1.878560  | -0.179886 | -3.524639 |
| C  | 1.205171  | -2.103024 | 1.874282  |

|    |           |           |           |
|----|-----------|-----------|-----------|
| H  | 0.182465  | -2.410741 | 2.095937  |
| H  | 1.876344  | -2.969406 | 1.908939  |
| H  | 1.530282  | -1.356132 | 2.609948  |
| C  | 1.211821  | 2.677618  | 0.868486  |
| H  | 0.192730  | 3.032520  | 1.027340  |
| H  | 1.890785  | 3.143127  | 1.592556  |
| H  | 1.532969  | 2.929874  | -0.150458 |
| C  | -1.202989 | 0.574561  | 2.759054  |
| H  | -1.508798 | 1.590448  | 2.478724  |
| H  | -1.888305 | 0.181221  | 3.519166  |
| H  | -0.184016 | 0.595329  | 3.147528  |
| C  | -1.208037 | 2.104686  | -1.873931 |
| H  | -1.545103 | 1.362085  | -2.608433 |
| H  | -1.870312 | 2.978083  | -1.904148 |
| H  | -0.183359 | 2.402407  | -2.100380 |
| H  | -2.149678 | -0.928398 | -0.909334 |
| H  | -2.151284 | -0.316352 | 1.261004  |
| H  | -2.151937 | 1.255231  | -0.350488 |
| H  | 2.147558  | 0.930041  | 0.913761  |
| H  | 2.150505  | 0.322397  | -1.258141 |
| H  | 2.149895  | -1.256136 | 0.349196  |
| Cl | 3.756578  | 0.000195  | 0.003466  |
| Cl | -3.758327 | 0.001389  | 0.000132  |
